# Supplementary material
Source: publisher figshare collection journal article supplement (https://sage.figshare.com/ndownloader/files/16705289)
Supplement: Supplementary file 1 [file 16705289]

## Supplementary Materials

### Stimuli Development

To develop our stimuli, information about the selected topics was obtained from credible science and technology sources. These sources are described in further detail here. For our message about self-driving cars, information was obtained from *WIRED*, *Forbes*, the U.S. National Highway Traffic Safety Administration, and the U.S. Department of Transportation. For our message about surgical robots, information was obtained from New York University's Langone Health Robotic Surgery Center, *Annals of Surgery*, and the U.S. Department of Health and Human Services. For our message about bioprinting, information was obtained from *Journal of Medical Ethics*, *Materials Today*, and *Bioprinting World*.

### Scale Items:

All items were responded to using 7-point Likert Scales ranging from Strongly Disagree (1) to Strongly Agree (7)

RC indicates the item was Reverse-Coded

### Processing Fluency (Shulman and Sweitzer, 2018)

- A lot of the information presented was new to me. (RC)
- Overall, I found the language used in this passage to be difficult. (RC)
- It was easy for me to understand the information presented.
- The passage I read was easy to read.
- A lot of the terms used were familiar to me.

### Motivated resistance to persuasion (Nisbet et al., 2015)

- The article was very objective. (RC)
- The article tried to pressure me to think a certain way.
- The article did not try to force its opinions on me. (RC)
- The article was very believable. (RC)
- The article was not very credible.
- The article tried to manipulate me.
- Sometimes I wanted to "argue back" against what I read in the article.
- I found myself think of ways I disagreed with the information in the article.

### Risk-Scale (Kahan et al., 2012)

- In the United States, [TOPIC] pose(s) a serious risk to human health
- In the United States, [TOPIC] pose(s) a serious risk to human safety
- In the United States, [TOPIC] pose(s) a serious risk to human prosperity

### Support Scale (Created here)

- I would support the use of self-driving cars in my community.
- Self-driving cars can solve transportation problems.
- Self-driving cars are safe.

- Self-driving cars make me uncomfortable. (RC)
- I would use a self-driving car if given the choice.
- I would support the use of surgical robots in my hospital.
- Surgical robots would make less mistakes than human surgeons.
- Surgical robots are safe.
- Surgical robots make me uncomfortable. (RC)
- I would prefer a surgical robot, over a human surgeon, if given the choice.
- I would support the use of medical printer in my hospital.
- Medical printers would address many medical problems.
- Medical printers are safe.
- I would prefer materials made from a medical printer than donated from a human if given the choice.
- Medical printers are unethical. (RC)
- Medical printers make me uncomfortable. (RC)
